# Supplementary material for: The Baltic Sea Virome: Diversity and Transcriptional Activity of DNA and RNA Viruses
Source: PubMed Central journal article supplement (PMC5309335; doi:10.1128/msystems.00125-16), 2017-02-14
Supplement: sys001172085sf7.pdf [file sys001172085sf7.pdf]

|                           |
|---------------------------|
| GS667_G9JOFJ3_3p0         |
| GS667_G9JOFJ3_0p8         |
| GS667_GCVIDIU02_0p1       |
| GS667_GQY5VXO03_viral     |
| GS669_GCVIDIU02_0p1       |
| GS665_G8GNNDP_3p0         |
| GS665_G8GNNDP_0p8         |
| GS665_GCX5D7Y01_0p1       |
| GS666_G9JOFJ3_3p0         |
| GS666_G9JOFJ3_0p8         |
| GS666_G8GNNDP_0p1         |
| GS666_G8GNNDP_viral       |
| GS673_G8TPZVL_3p0         |
| GS673_G8TPZVL_0p8         |
| GS673_G8TPZVL_0p1         |
| GS674_HAVSY8S_3p0         |
| GS674_HAVSY8S_0p8         |
| GS674_G8TPZVL_0p1         |
| GS659_G8KGLNH_3p0         |
| GS659_G8KGLNH_0p8         |
| GS659_GCX5D7Y01_0p1       |
| GS660_G8GNNDP_3p0         |
| GS660_G8KGLNH_0p8         |
| GS660_G8KGLNH_0p1         |
| GS660_G8KGLNH_viral       |
| GS677_HAVSY8S_3p0         |
| GS677_HAVSY8S_0p8         |
| GS677_GCVEAXJ02_0p1       |
| GS678_HA8TPRT_HAQD3ZU_3p0 |
| GS678_HA8TPRT_HAQD3ZU_0p8 |
| GS678_GCVEAXJ02_0p1       |
| GS678_GLDFQNX01_viral     |
| GS679_GDNEDKP02_3p0       |
| GS679_HAQD3ZU_0p8         |
| GS679_HAQD3ZU_0p1         |
| GS679_GLDFQNX01_viral     |
| GS680_GDNEDKP02_3p0       |
| GS681_HAT060T_3p0         |
| GS681_HA8TPRT_HAQD3ZU_0p8 |
| GS681_GCXE2IL02_0p1       |
| GS682_HAT060T_3p0         |
| GS682_HAT060T_0p8         |
| GS682_HAT060T_0p1         |
| GS683_HAISP3_3p0          |
| GS683_HAISP3_0p8          |
| GS683_GCXE2IL02_0p1       |
| GS684_HA07AON_3p0         |
| GS684_HAISP3_0p8          |
| GS684_HAISP3_0p1          |
| GS685_HA07AON_3p0         |
| GS685_HA07AON_0p8         |
| GS685_GCZC3J301_0p1       |
| GS686_HAOJ6US_3p0         |
| GS686_HAOJ6US_0p8         |
| GS686_HA07AON_0p1         |
| GS694_HABNP3B_3p0         |
| GS694_HABNP3B_0p8         |
| GS694_HABNP3B_0p1         |
| GS695_HABNP3B_3p0         |
| GS695_HABNP3B_0p8         |
| GS695_GDQ27C301_0p1       |
| GS695_GLDFQNX02_viral     |
| GS687_HAOJ6US_3p0         |
| GS687_HAOJ6US_0p8         |
| GS687_GCZC3J301_0p1       |
| GS688_HAN8WWE_3p0         |
| GS688_HAN8WWE_0p8         |
| GS688_GCZC3J302_0p1       |
| GS689_HAN8WWE_3p0         |
| GS689_HAN8WWE_0p8         |
| GS689_GCZC3J302_0p1       |
| GS689_GQY5VXO04_viral     |
